# Supplementary material for: High-contrast and reversible mechanochromic luminescence of a D–π–A compound with a twisted molecular conformation
Source: Royal Society of Chemistry journal article supplement (doi:10.1039/c5ra12050k), 2015-01-01
Supplement: c5ra12050k1.pdf [file c5ra12050k1.pdf]

## Supporting Information

### High-contrast and reversible mechanochromic luminescence of a D- $\pi$ -A compound with a twisted molecular conformation

Jinbei Wei, Baoyan Liang, Xiao Cheng, Zuolun Zhang,\* Hongyu Zhang, Yue Wang

State Key Laboratory of Supramolecular Structure and Materials, College of Chemistry, Jilin  
University, Changchun 130012, P. R. China  
E-mail: zuolunzhang@jlu.edu.cn

#### *Contents*

|                                                                            |         |
|----------------------------------------------------------------------------|---------|
| TD-DFT results of TPAANDCV and <b>1</b>                                    | S2–S3   |
| UV-vis absorption and emission spectra of TPAANDCV and <b>1</b>            | S4–S5   |
| PXRD results of TPAANDCV                                                   | S6      |
| DSC analysis for crystalline and ground TPAANDCV                           | S7      |
| PXRD results of <b>1</b>                                                   | S7      |
| Single-crystal structure of <b>1</b>                                       | S8      |
| DFT-optimized structure of TPAANDCV                                        | S8      |
| Fluorescence excitation spectra of TPAANDCV measured in different solvents | S8      |
| Experimental details for the AIE experiment of TPAANDCV                    | S9      |
| Single-crystal X-ray diffraction data of TPAANDCV and <b>1</b>             | S9      |
| NMR spectra of compound <b>1</b> and TPAANDCV                              | S10–S11 |
| DFT Cartesian Coordinates                                                  | S12–S15 |

**Table S1** TD-DFT results calculated for TPAANDCV at the M06-2X/6-31G(d,p) level.<sup>a</sup>

| Transition         | $f$   | $\lambda_{\text{ex}} / \text{nm}$ | Dominant Components <sup>b</sup>                                   |
|--------------------|-------|-----------------------------------|--------------------------------------------------------------------|
| S1 $\leftarrow$ S0 | 0.253 | 399                               | LUMO $\leftarrow$ HOMO-1 (82%)<br>LUMO $\leftarrow$ HOMO (10%)     |
| S2 $\leftarrow$ S0 | 0.277 | 351                               | LUMO+1 $\leftarrow$ HOMO-1 (77%)<br>LUMO+1 $\leftarrow$ HOMO (14%) |
| S6 $\leftarrow$ S0 | 1.042 | 291                               | LUMO $\leftarrow$ HOMO-3 (52%)<br>LUMO $\leftarrow$ HOMO-4 (41%)   |
| S8 $\leftarrow$ S0 | 0.292 | 278                               | LUMO+4 $\leftarrow$ HOMO (87%)                                     |
| S9 $\leftarrow$ S0 | 0.243 | 271                               | LUMO+6 $\leftarrow$ HOMO (60%)<br>LUMO+5 $\leftarrow$ HOMO (30%)   |

<sup>a</sup> transitions with oscillator strength higher than 0.03 shown. <sup>b</sup> Components with greater than 10% contribution shown. Percentage contribution approximated by  $2 \times (ci)^2 \times 100\%$ , where  $ci$  is the coefficient for the particular orbital rotation.

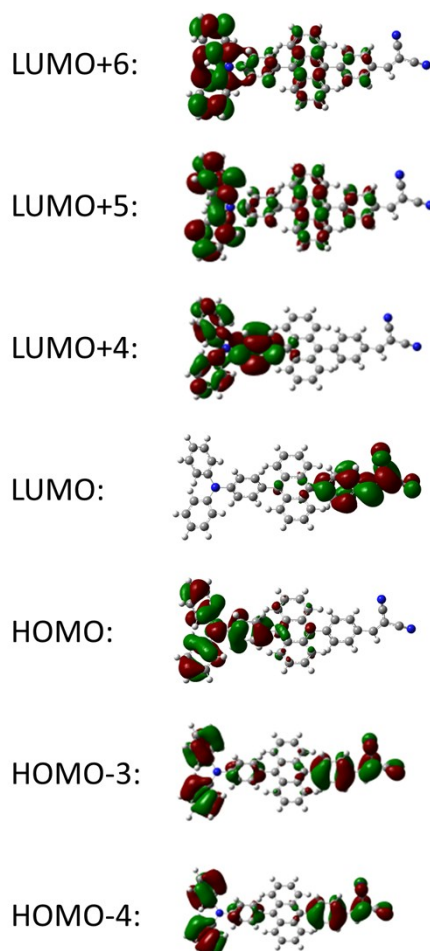**Fig. S1** Molecular orbitals involved in the S6  $\leftarrow$  S0, S8  $\leftarrow$  S0 and S9  $\leftarrow$  S0 transitions which may be responsible for the highest-energy absorption band of TPAANDCV.

**Table S2** TD-DFT results calculated for **1** at the M06-2X/6-31G(d,p) level.<sup>a</sup>

| Transition         | $f$   | $\lambda_{\text{ex}} / \text{nm}$ | Dominant Components <sup>b</sup>                                   |
|--------------------|-------|-----------------------------------|--------------------------------------------------------------------|
| S1 $\leftarrow$ S0 | 0.375 | 358                               | LUMO $\leftarrow$ HOMO-1 (59%)<br>LUMO $\leftarrow$ HOMO (36%)     |
| S7 $\leftarrow$ S0 | 0.480 | 277                               | LUMO+3 $\leftarrow$ HOMO (71%)<br>LUMO+3 $\leftarrow$ HOMO-1 (12%) |
| S8 $\leftarrow$ S0 | 0.246 | 272                               | LUMO+5 $\leftarrow$ HOMO (75%)<br>LUMO+5 $\leftarrow$ HOMO-1 (18%) |

<sup>a</sup> transitions with oscillator strength higher than 0.03 shown. <sup>b</sup> Components with greater than 10% contribution shown. Percentage contribution approximated by  $2 \times (ci)^2 \times 100\%$ , where  $ci$  is the coefficient for the particular orbital rotation.

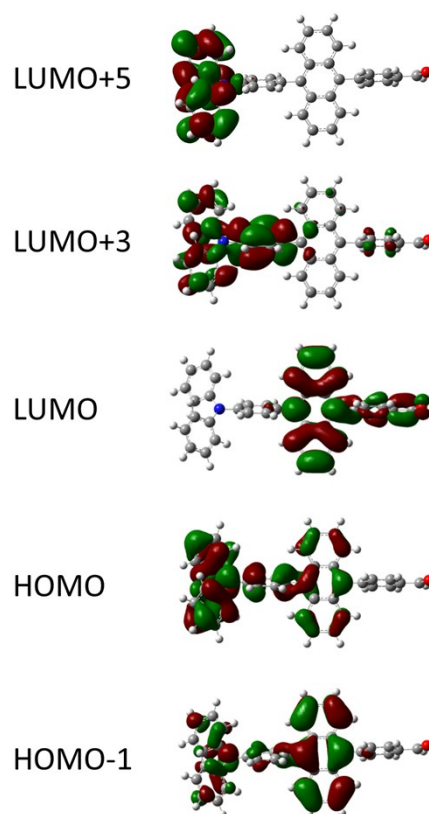

**Fig. S2** Molecular orbitals involved in the S1  $\leftarrow$  S0, S7  $\leftarrow$  S0 and S8  $\leftarrow$  S0 transition of compound **1**.

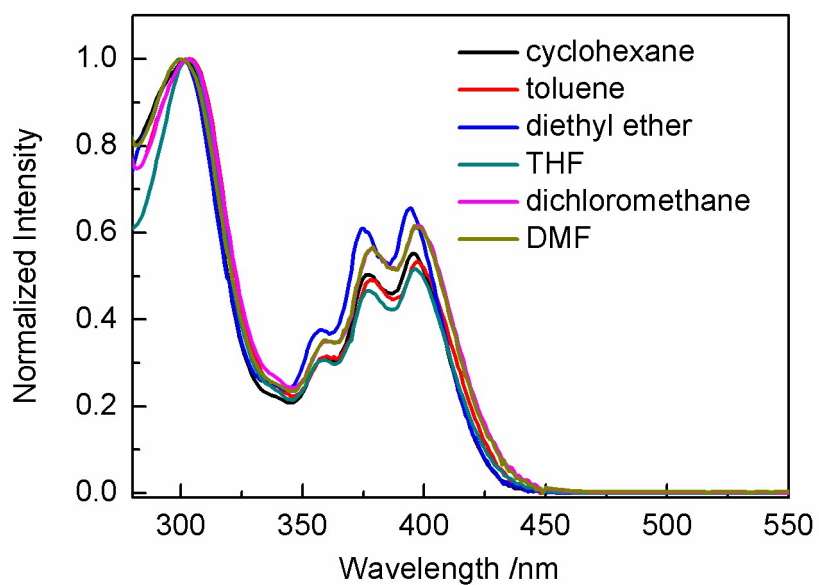

**Fig. S3** UV-vis absorption spectra of **1** in different solvents.

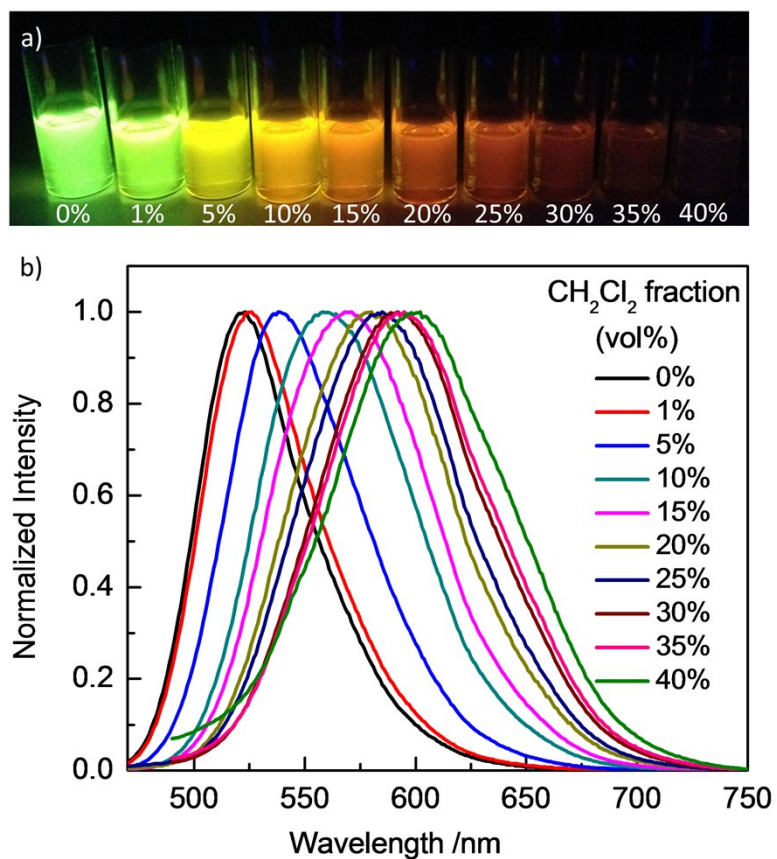

**Fig. S4** Emission colours (a) and emission spectra (b) of TPAANDCV in cyclohexane/dichloromethane mixtures with different dichloromethane fractions (vol %).

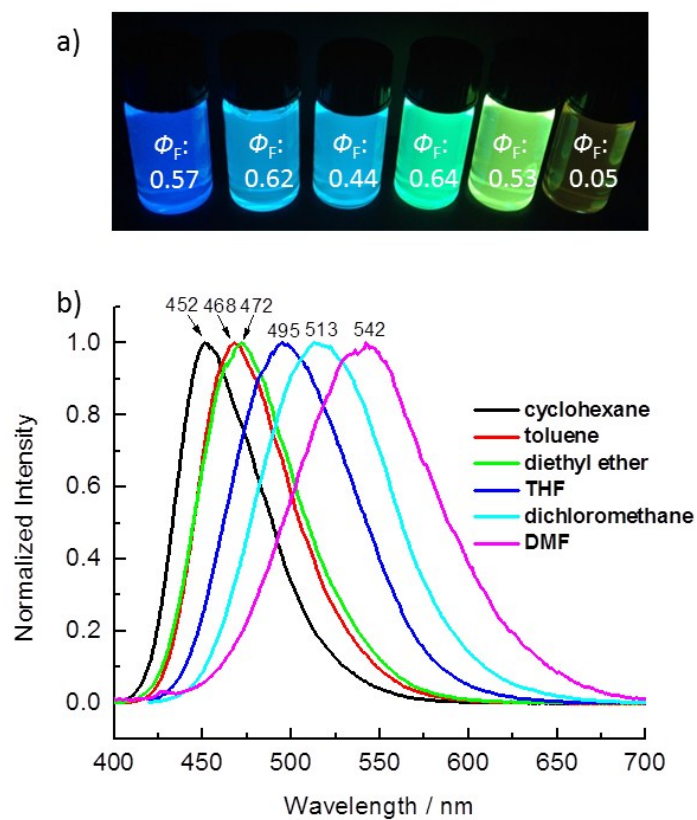

**Fig. S5** a) Photos of the solutions of **1** taken under UV light, given in the solvent order (from left to right) of cyclohexane, toluene, Et<sub>2</sub>O, THF, CH<sub>2</sub>Cl<sub>2</sub> and DMF; b) emission spectra of **1** in various solvents.

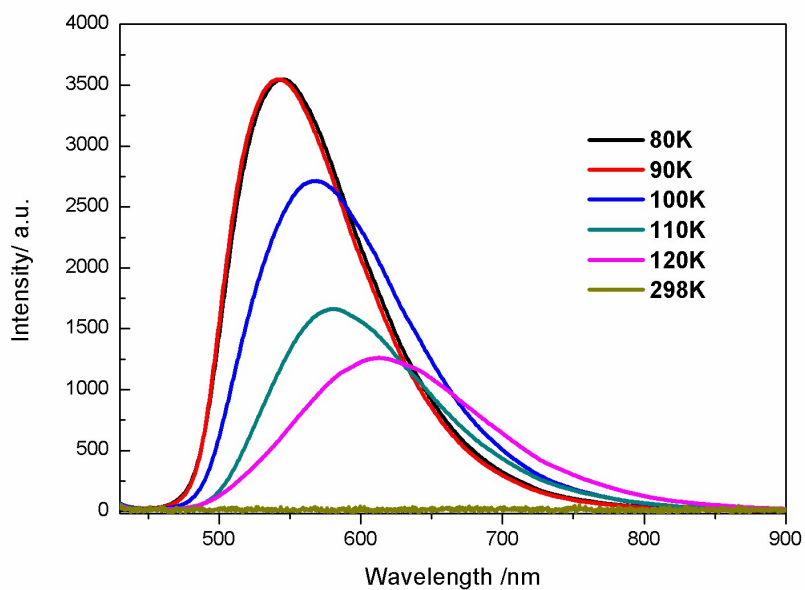

**Fig. S6** Temperature-dependent emission spectra of TPAANDCV measured in 2-MeTHF.

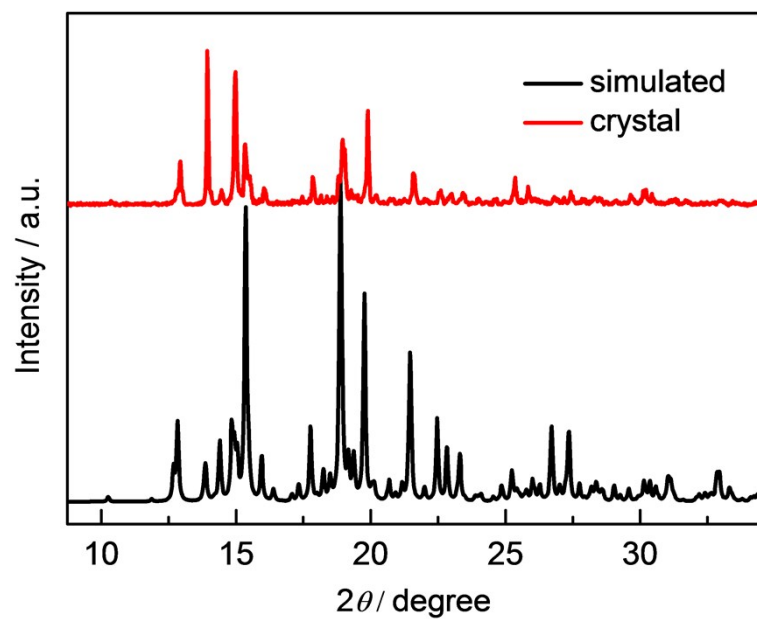

**Fig. S7** Comparison between simulated and measured PXR patterns of the single crystals of TPAANDCV.

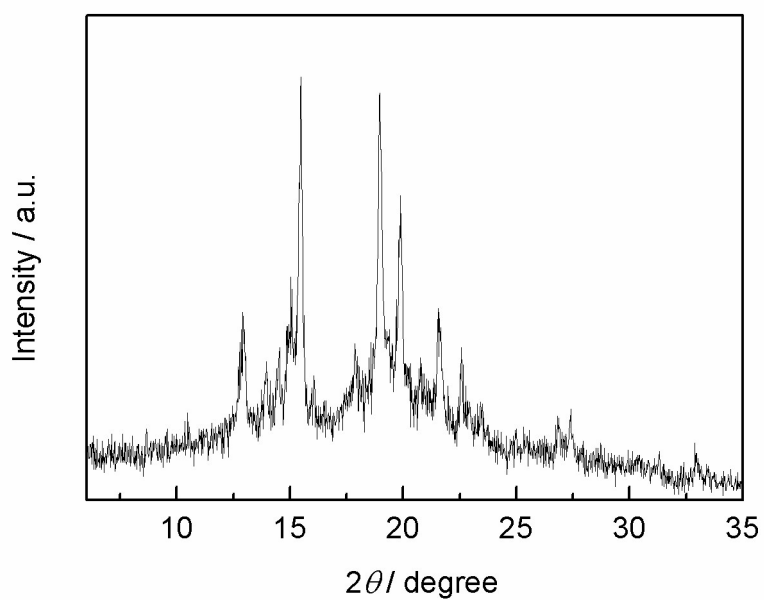

**Fig. S8** PXR pattern showing the weak and broad diffuse halo of the ground powder of TPAANDCV.

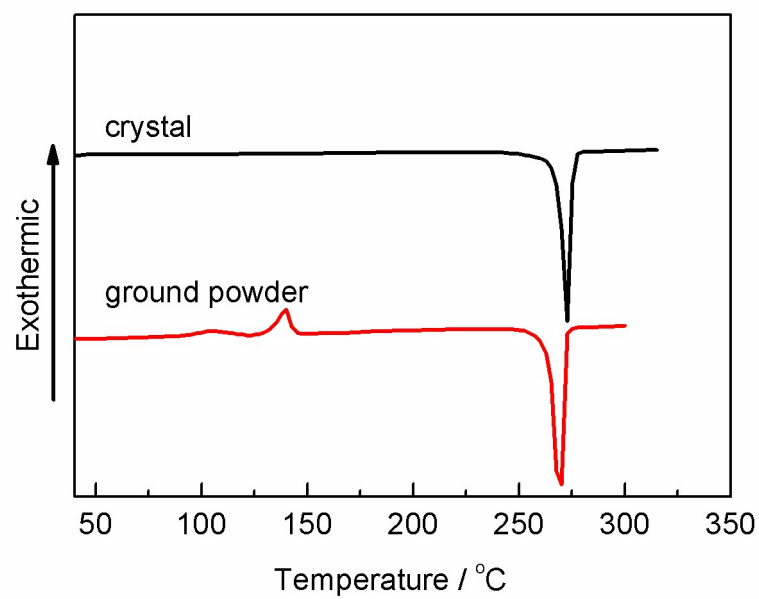

**Fig. S9** DSC curves of the crystals and the ground powder of TPAANDCV.

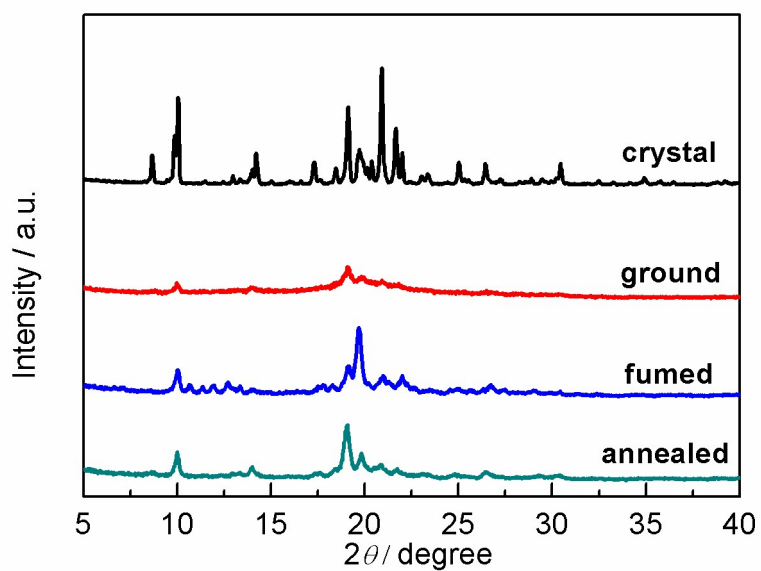

**Fig. S10** PXRD patterns of the crystals, ground powder and the annealed and vapour-fumed ground powders of compound 1.

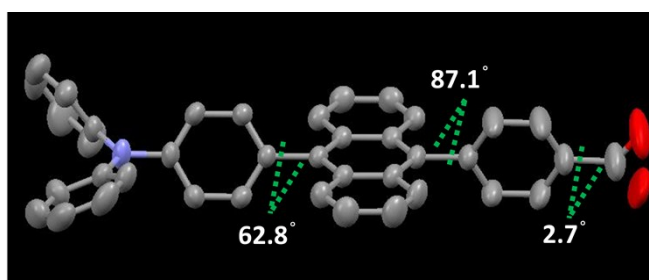

**Fig. S11** Single-crystal structure of compound **1**. The formyl group is disordered, but the 4-formylphenyl group keeps an almost planar conformation.

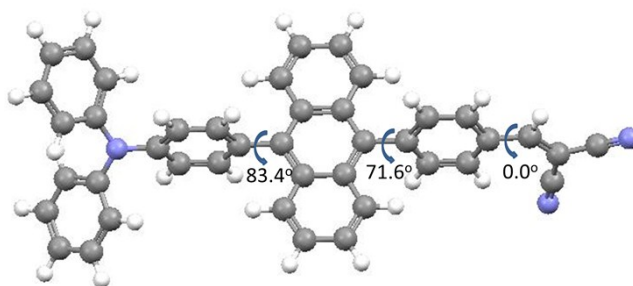

**Fig. S12** DFT-optimized ground-state geometry of TPAANDCV.

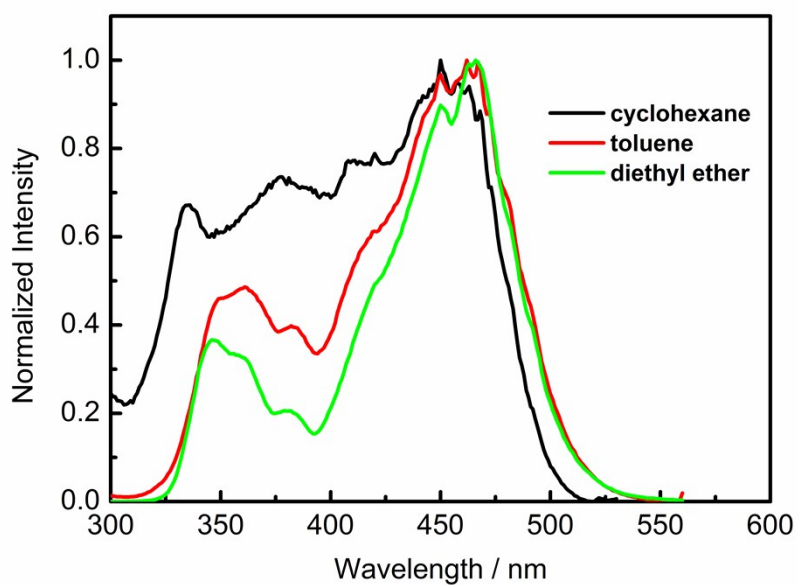

**Fig. S13** Fluorescence excitation spectra of TPAANDCV measured in different solvents ( $10^{-5}$  M). The emission maximum of corresponding solution (452, 468 and 472 nm for cyclohexane, toluene and diethyl ether solutions, respectively) was adopted as the monitored wavelength.



**Table S3** The amount of THF and water used for preparing the solutions for AIE experiment.

|                                  |     |     |     |     |     |     |     |     |     |     |
|----------------------------------|-----|-----|-----|-----|-----|-----|-----|-----|-----|-----|
| 10 <sup>-4</sup> M solution / mL | 0.4 | 0.4 | 0.4 | 0.4 | 0.4 | 0.4 | 0.4 | 0.4 | 0.4 | 0.4 |
| Pure THF / mL                    | 3.6 | 3.2 | 2.8 | 2.4 | 2.0 | 1.6 | 1.2 | 0.8 | 0.4 | 0   |
| Pure H <sub>2</sub> O / mL       | 0   | 0.4 | 0.8 | 1.2 | 1.6 | 2.0 | 2.4 | 2.8 | 3.2 | 3.6 |
| H <sub>2</sub> O fraction        | 0%  | 10% | 20% | 30% | 40% | 50% | 60% | 70% | 80% | 90% |

Single-crystal X-ray diffraction data of TPAANDCV:

C<sub>42</sub>H<sub>27</sub>N<sub>3</sub>,  $M = 573.67$ , monoclinic,  $P2_1/c$ ,  $a = 34.719(7)$  Å,  $b = 7.6271(15)$  Å,  $c = 11.943(2)$  Å,  $\alpha = 90^\circ$ ,  $\beta = 97.05(3)^\circ$ ,  $\gamma = 90^\circ$ ,  $V = 3138.5(11)$  Å<sup>3</sup>,  $Z = 4$ ,  $T = 293(2)$  K, 29723 reflections measured, 7134 unique; The final  $wR_2$  was 0.1263 (all data) and  $R_1$  was 0.0443 ( $I \geq 2\sigma(I)$ ); CCDC number: 1056935.

Single-crystal X-ray diffraction data of **1**:

C<sub>39</sub>H<sub>27</sub>NO,  $M = 525.62$ , triclinic,  $P-1$ ,  $a = 7.7432(15)$  Å,  $b = 9.5790(19)$  Å,  $c = 21.157(4)$  Å,  $\alpha = 95.62(3)^\circ$ ,  $\beta = 99.49(3)^\circ$ ,  $\gamma = 108.71(3)^\circ$ ,  $V = 1446.8(5)$  Å<sup>3</sup>,  $Z = 2$ ,  $T = 293(2)$  K, 14199 reflections measured, 6524 unique; The final  $wR_2$  was 0.1921 (all data) and  $R_1$  was 0.0584 ( $I \geq 2\sigma(I)$ ); CCDC number: 1410073.

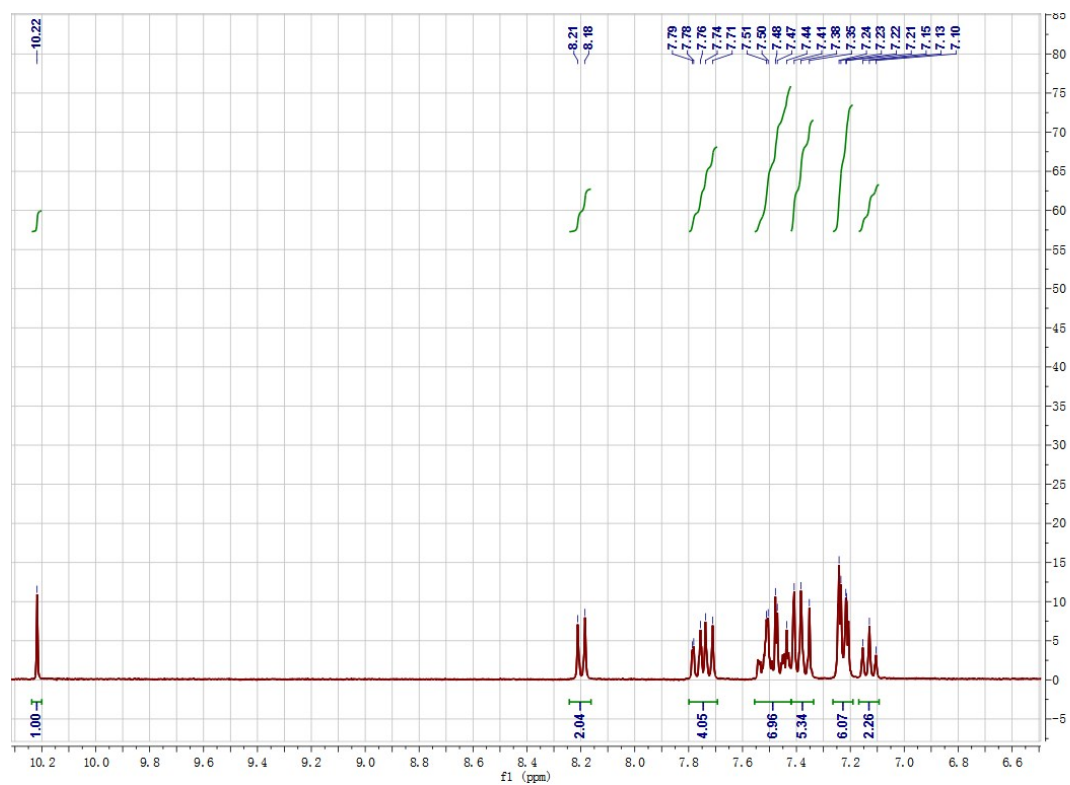

Fig. S13  $^1\text{H}$  NMR (300 MHz) spectrum of compound **1** in  $\text{DMSO-}d_6$ .

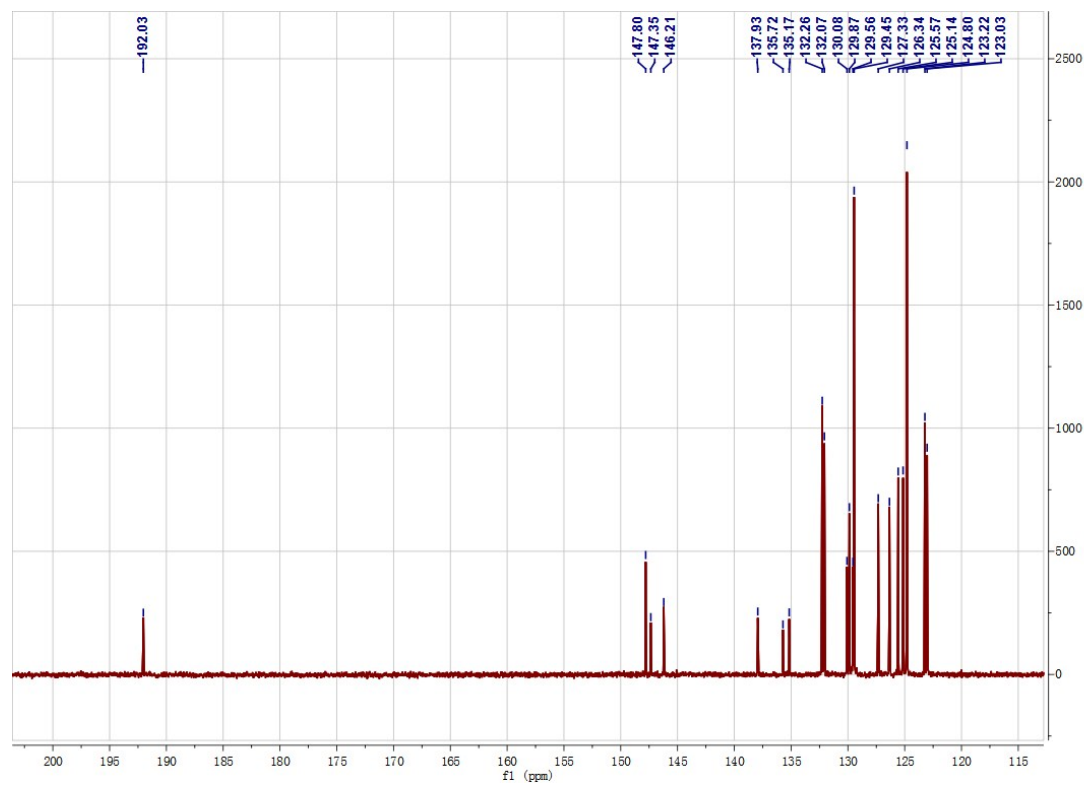

Fig. S14  $^{13}\text{C}\{^1\text{H}\}$  NMR (125 MHz) spectrum of compound **1** in  $\text{CDCl}_3$ .

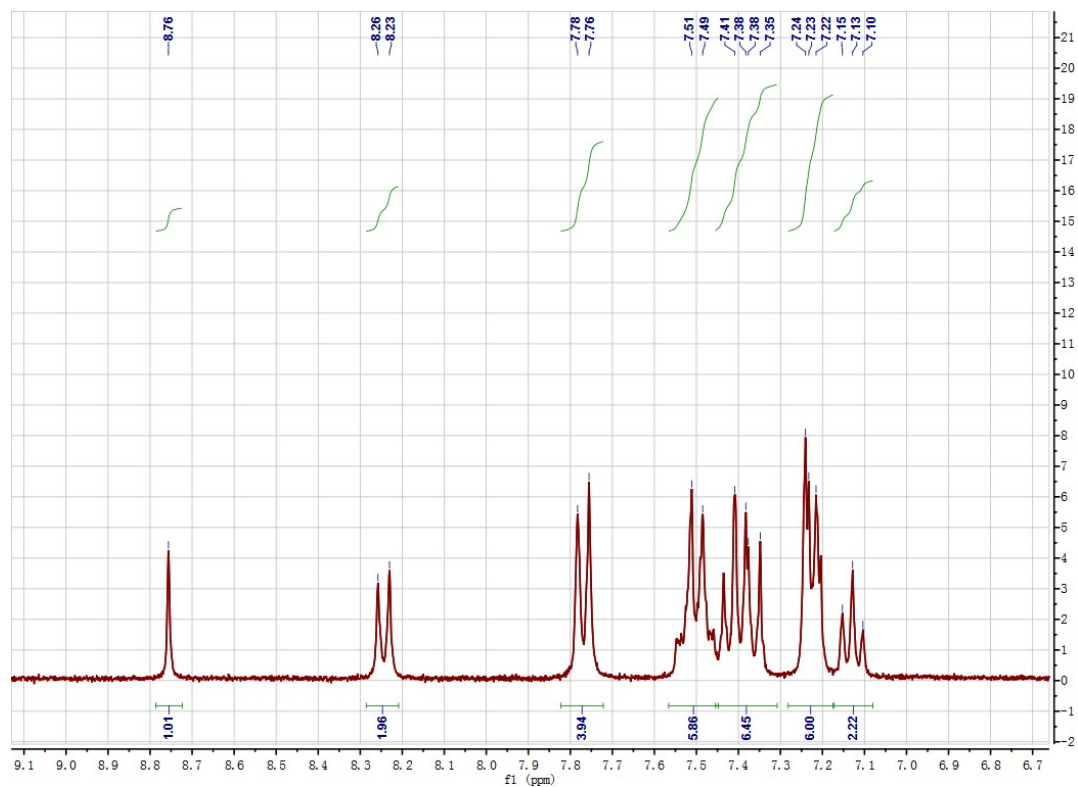

Fig. S15  $^1\text{H}$  NMR (300MHz) spectrum of TPAANDCV in  $\text{DMSO-}d_6$ .

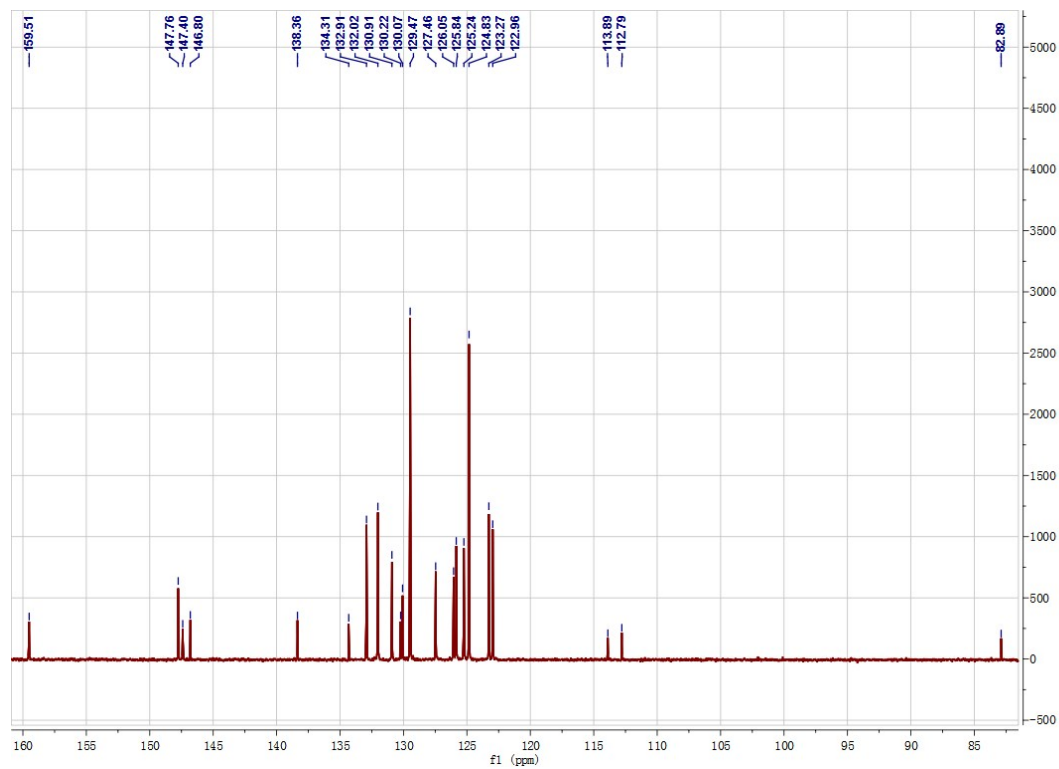

Fig. S16  $^{13}\text{C}\{^1\text{H}\}$  NMR (125 MHz) spectrum of TPAANDCV in  $\text{CDCl}_3$ .

*DFT Cartesian Coordinates*

Compound **TPAANDCV**

| <b>Symbol</b> | <b>X</b>     | <b>Y</b>    | <b>Z</b>    |
|---------------|--------------|-------------|-------------|
| C             | -8.60780200  | -0.42738000 | 0.40998200  |
| C             | 0.01986000   | -0.12954200 | 0.12655900  |
| C             | 4.34705300   | 0.02647000  | -0.02193400 |
| C             | 1.51516300   | -0.07945900 | 0.07541500  |
| C             | 6.53990900   | -1.04685400 | 0.31057200  |
| C             | -0.70292400  | 0.94524300  | 0.68993600  |
| C             | -4.32761800  | -0.25334500 | 0.24446100  |
| C             | -0.66909300  | -1.24741800 | -0.39336000 |
| C             | -2.11453200  | -1.29097300 | -0.35648500 |
| C             | -2.14796300  | 0.90337900  | 0.73609400  |
| C             | -2.83483700  | -0.21393000 | 0.20865900  |
| C             | 6.41561700   | 1.27187600  | -0.50126400 |
| C             | -7.16551200  | -0.31634800 | 0.30052100  |
| C             | -9.62018500  | 0.21843500  | -0.24454000 |
| C             | -2.77063900  | -2.42844900 | -0.93047400 |
| C             | 3.68811100   | -0.64327000 | 1.02261600  |
| C             | 0.02966300   | -2.35077300 | -0.98241700 |
| C             | -2.06050800  | -3.46124800 | -1.48160200 |
| C             | 8.08510700   | -3.27372300 | 1.05866400  |
| C             | -5.00886500  | -1.11828300 | 1.11627000  |
| C             | 6.17085900   | -2.33910500 | -0.09584600 |
| C             | -0.03794500  | 2.08883900  | 1.24006400  |
| C             | 7.50306200   | 1.20446100  | -1.38628300 |
| C             | -6.47872400  | 0.55155400  | -0.57640500 |
| C             | 8.46023800   | -1.98864600 | 1.45509400  |
| C             | 7.69278400   | -0.88300900 | 1.09462300  |
| C             | -5.09073700  | 0.57691100  | -0.59659700 |
| C             | 2.29760300   | -0.70000900 | 1.06057300  |
| C             | -6.39664100  | -1.14797500 | 1.14368700  |
| C             | -9.44913500  | 1.21914400  | -1.25394400 |
| C             | -0.63953900  | -3.42445800 | -1.50486400 |
| C             | 2.17999000   | 0.59466700  | -0.95989200 |
| C             | 7.71192800   | 3.61798600  | -1.34805400 |
| C             | -10.98005600 | -0.10444500 | 0.07875200  |
| C             | 5.98569600   | 2.52754700  | -0.04408700 |
| C             | -2.83638900  | 2.00129900  | 1.34790600  |
| C             | -0.73843300  | 3.12179300  | 1.80213700  |
| C             | 6.93449900   | -3.44042200 | 0.28559400  |
| C             | 3.56995700   | 0.64209300  | -1.01730200 |

|   |              |             |             |
|---|--------------|-------------|-------------|
| C | 8.14809500   | 2.36960600  | -1.79609300 |
| C | 6.62545900   | 3.68837900  | -0.47400400 |
| C | -2.15807900  | 3.07500400  | 1.85962700  |
| H | 1.11238800   | -2.31727500 | -1.01177300 |
| H | -3.85381700  | -2.46153600 | -0.93171000 |
| H | 7.83707600   | 0.23728300  | -1.74673000 |
| H | -2.58420300  | -4.31022500 | -1.91104100 |
| H | 1.04470400   | 2.11977500  | 1.20692600  |
| H | 4.27066900   | -1.11725000 | 1.80510500  |
| H | 9.34946900   | -1.84368200 | 2.06184800  |
| H | 5.28646100   | -2.47246900 | -0.70982300 |
| H | 5.15135700   | 2.58564200  | 0.64692700  |
| H | 1.80905100   | -1.22029700 | 1.87945100  |
| H | -0.08667700  | -4.24768500 | -1.94740700 |
| H | -4.57969100  | 1.24827700  | -1.27937200 |
| H | -6.90345700  | -1.82129200 | 1.82980100  |
| H | 4.06091200   | 1.15686600  | -1.83596700 |
| H | -3.91792300  | 1.97162500  | 1.40937800  |
| H | -7.02467400  | 1.20432600  | -1.24536800 |
| H | 1.59855900   | 1.07629400  | -1.74080200 |
| H | 8.21252100   | 4.52399800  | -1.67510800 |
| H | -4.44018900  | -1.76492200 | 1.77691700  |
| H | -2.70572800  | 3.89300700  | 2.31823400  |
| H | 7.98107200   | 0.11220900  | 1.41578500  |
| H | -8.94672700  | -1.15425500 | 1.14435600  |
| H | 8.68164000   | -4.13346100 | 1.34744900  |
| H | 8.98820300   | 2.29986100  | -2.48108900 |
| H | 6.28040100   | 4.65207900  | -0.11046800 |
| H | 6.63474300   | -4.43315800 | -0.03783000 |
| H | -0.21074200  | 3.97703900  | 2.21358100  |
| N | 5.76256200   | 0.08240400  | -0.07041600 |
| N | -12.08089900 | -0.37085800 | 0.34552500  |
| N | -9.33200300  | 2.03495000  | -2.07588300 |

#### Compound 1

| Symbol | X           | Y           | Z           |
|--------|-------------|-------------|-------------|
| C      | 9.55296500  | -0.01464300 | 0.11426700  |
| C      | 0.90597900  | -0.00280200 | 0.03751700  |
| C      | -3.42596500 | 0.00119800  | -0.00691900 |
| C      | -0.59053700 | -0.00133600 | 0.02245100  |
| C      | -5.56496700 | -1.14364400 | 0.41627600  |
| C      | 1.61617400  | -1.15475900 | -0.36784500 |

|   |             |             |             |
|---|-------------|-------------|-------------|
| C | 5.26040400  | -0.00658400 | 0.07789200  |
| C | 1.61016000  | 1.14799900  | 0.45635400  |
| C | 3.05673500  | 1.15130500  | 0.46191500  |
| C | 3.06253700  | -1.16023000 | -0.34596400 |
| C | 3.76414800  | -0.00511000 | 0.06495100  |
| C | -5.55347500 | 1.14931900  | -0.47586100 |
| C | 8.07380500  | -0.01075300 | 0.09707300  |
| C | 3.72987000  | 2.35114700  | 0.86352400  |
| C | -2.71898700 | -0.59578400 | 1.04987500  |
| C | 0.92774400  | 2.33095500  | 0.89019000  |
| C | 3.03487200  | 3.46243900  | 1.25893400  |
| C | -6.99646500 | -3.40549100 | 1.27755500  |
| C | 5.96583000  | -0.11342700 | 1.28714000  |
| C | -6.70183300 | -1.00099000 | 1.22755700  |
| C | 0.94037900  | -2.33658300 | -0.81480900 |
| C | -6.67143900 | 1.00844900  | -1.31334800 |
| C | 7.37684500  | 0.09731400  | -1.11572500 |
| C | -5.86119100 | -3.55079000 | 0.47793600  |
| C | -5.15404000 | -2.43258500 | 0.04079100  |
| C | 5.98770400  | 0.09863800  | -1.12278700 |
| C | -1.32692900 | -0.60253200 | 1.05442400  |
| C | 7.35854600  | -0.11579100 | 1.29625400  |
| C | 1.61323300  | 3.44983500  | 1.28028000  |
| C | -1.30434000 | 0.60139400  | -1.02442700 |
| C | -6.96181000 | 3.41334800  | -1.36890000 |
| C | -5.14983400 | 2.43754700  | -0.09022300 |
| C | 3.74154300  | -2.36048100 | -0.73617900 |
| C | 1.63159300  | -3.45610300 | -1.19284300 |
| C | -7.41310900 | -2.12431600 | 1.64415400  |
| C | -2.69618500 | 0.59714800  | -1.04865600 |
| C | -7.37147500 | 2.13288200  | -1.74569700 |
| C | -5.84524300 | 3.55687600  | -0.54306600 |
| C | 3.05256300  | -3.47048300 | -1.14555300 |
| H | -0.15580700 | 2.32490400  | 0.90436500  |
| H | 4.81335300  | 2.36973900  | 0.84813900  |
| H | -6.98588600 | 0.01633000  | -1.61931100 |
| H | 3.57005000  | 4.35895600  | 1.55790000  |
| H | -0.14270200 | -2.32910400 | -0.84930000 |
| H | -3.26587100 | -1.05283700 | 1.86745900  |
| H | -5.52947000 | -4.54066000 | 0.17774100  |
| H | -7.02198900 | -0.00829000 | 1.52557900  |
| H | -4.29204600 | 2.55342800  | 0.56372300  |
| H | -0.79987300 | -1.06775000 | 1.88242300  |
| H | 1.07185300  | 4.33347100  | 1.60519100  |

|   |             |             |             |
|---|-------------|-------------|-------------|
| H | 5.44753300  | 0.18391700  | -2.06082500 |
| H | 7.89760400  | -0.20231100 | 2.23700200  |
| H | -3.22524000 | 1.05518800  | -1.87732400 |
| H | 4.82457600  | -2.38028500 | -0.70202700 |
| H | 7.94680700  | 0.18103600  | -2.03561700 |
| H | -0.75937500 | 1.06585100  | -1.84117100 |
| H | -7.50548600 | 4.28737000  | -1.71377500 |
| H | 5.41337800  | -0.19720700 | 2.21793900  |
| H | 3.59212700  | -4.36699700 | -1.43647700 |
| H | -4.28141100 | -2.54984100 | -0.59295300 |
| H | -7.54911400 | -4.27867300 | 1.61007600  |
| H | -8.23441500 | 2.00563800  | -2.39307000 |
| H | -5.51934400 | 4.54619400  | -0.23479600 |
| H | -8.29066000 | -1.99563500 | 2.27129000  |
| H | 1.09520700  | -4.33872700 | -1.52859400 |
| N | -4.84427800 | 0.00232100  | -0.02179800 |
| H | 10.00264000 | -0.10657600 | 1.12837700  |
| O | 10.25733300 | 0.07264300  | -0.87380200 |
